# Supplementary material for: Unappreciated subcontinental admixture in Europeans and European Americans and implications for genetic epidemiology studies
Source: PubMed Central journal article supplement (PMC10630423; doi:10.1038/s41467-023-42491-0), 2023-11-07
Supplement: 41467_2023_42491_MOESM1_ESM.pdf [file 41467_2023_42491_MOESM1_ESM.pdf]

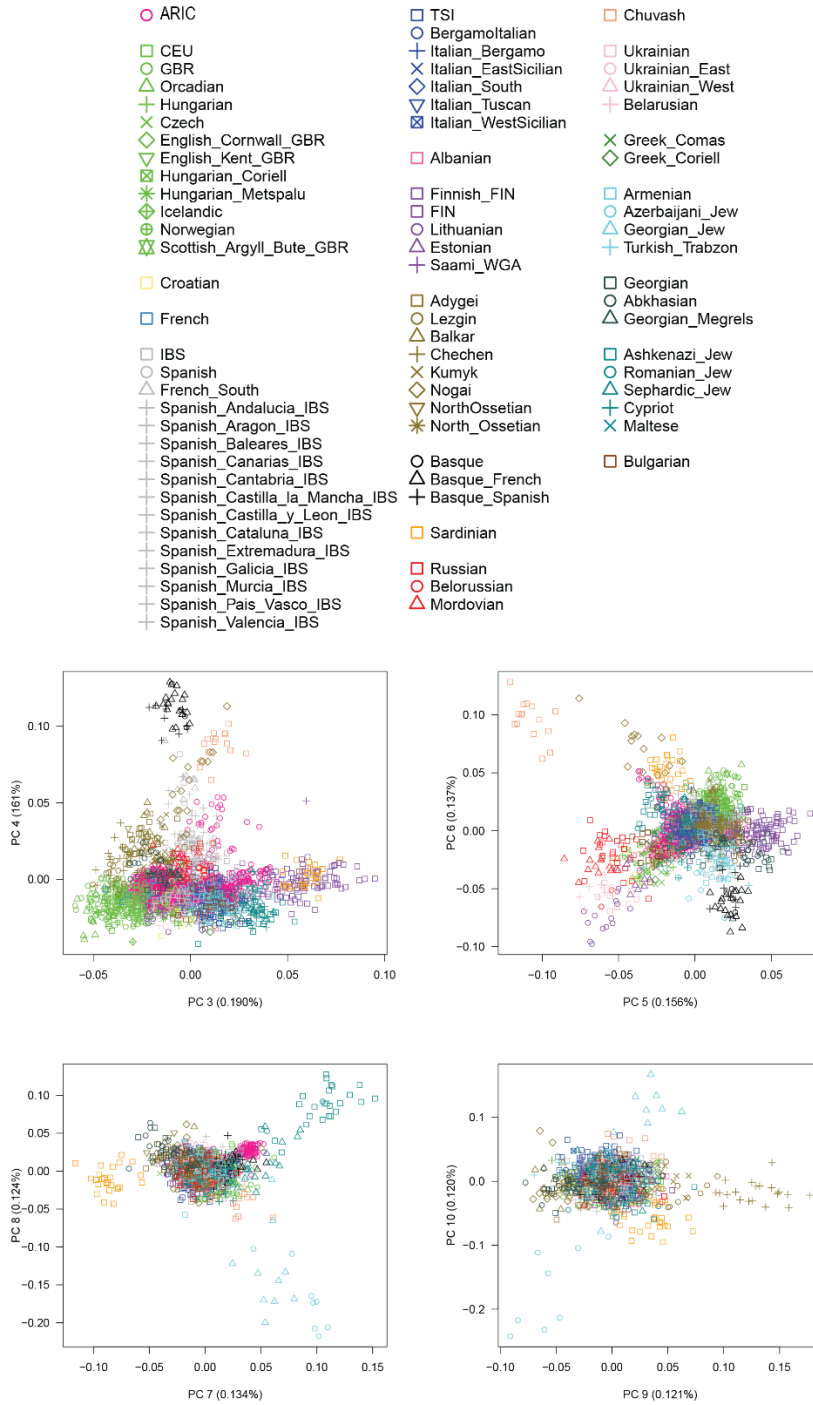

**Fig. S1. Principal component analysis (principal components 3 through 10) of the European reference panel. European Americans (ARIC cohort) were projected onto the European reference panel.**

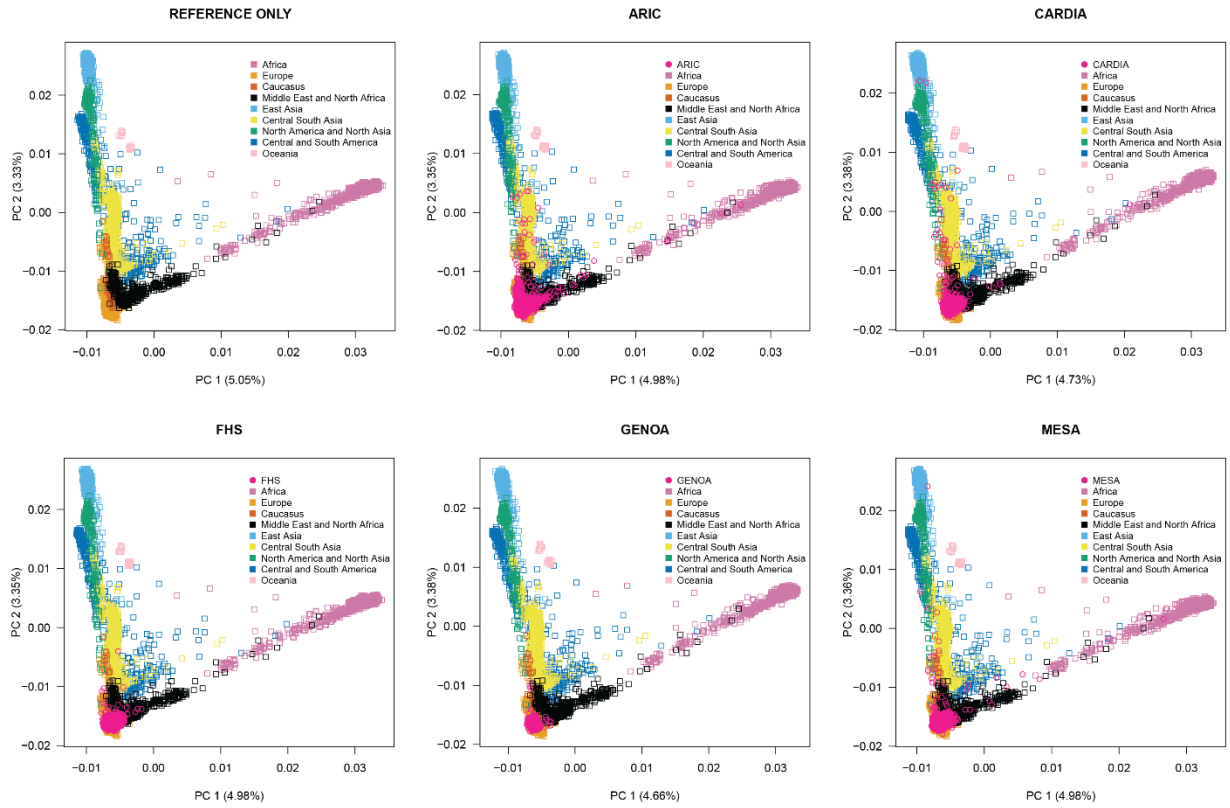

**Fig. S2. Principal component analysis of the worldwide reference panel. Each European American cohort is projected onto the worldwide reference panel.**

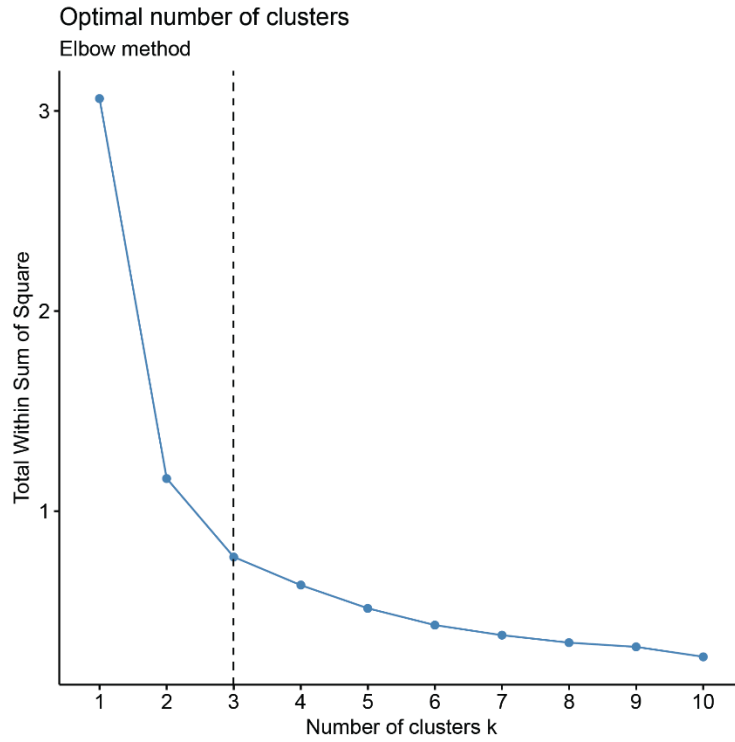

**Fig. S3. Estimated number of clusters ( $k$ ) using the elbow method.** The number of clusters of European American individuals was estimated from the first two principal components derived from the projection of all European Americans onto the European reference panel.

## Ancestry corrections

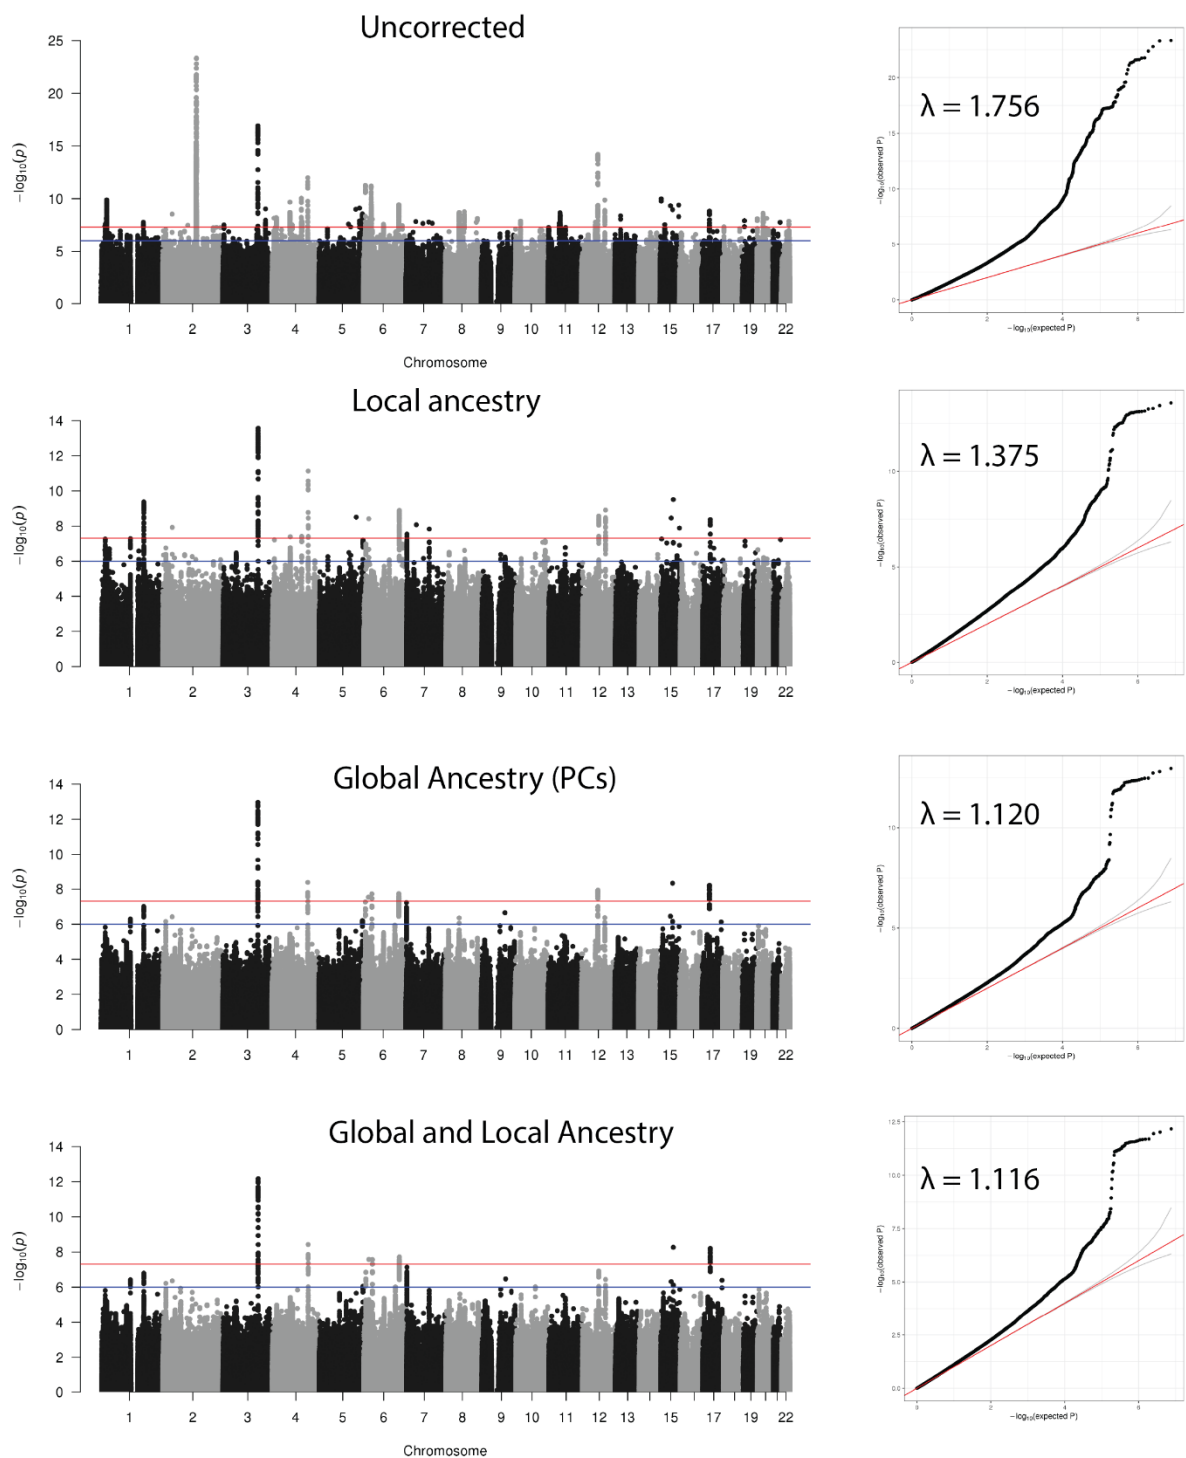

**Fig. S4. Manhattan and q-q plots of GWAS of the trajectory of height accounting for different levels of control of population stratification.** The models were adjusted for the top 12 Principal components significantly associated with height.

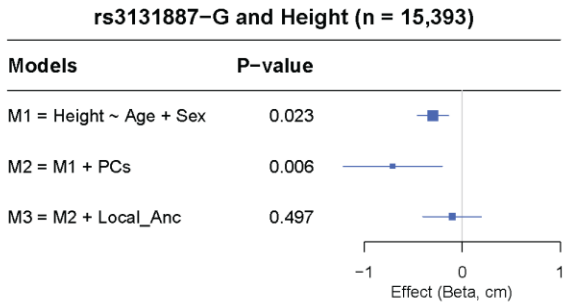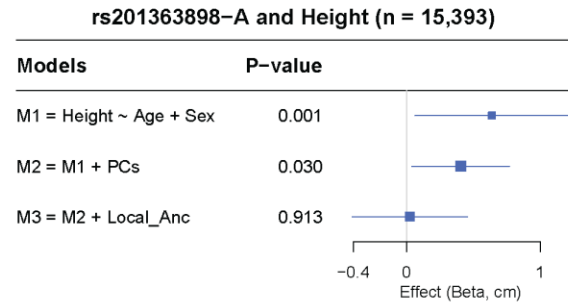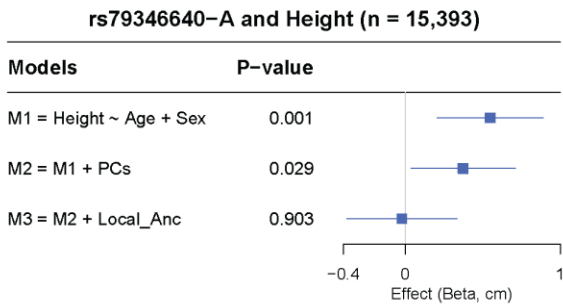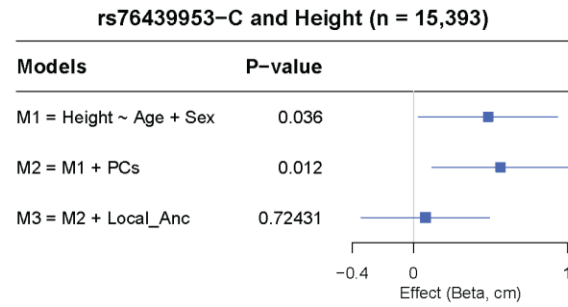

**Fig. S5. Genetic loci with strong local ancestry effect in GWAS of height.** The models were adjusted for the top 12 Principal components significantly associated with height. Forest plots show  $\beta$  values (95% confidence intervals) and  $p$ -values from linear models.
