# Supplementary material for: Unappreciated subcontinental admixture in Europeans and European Americans and implications for genetic epidemiology studies
Source: PubMed Central journal article supplement (PMC10630423; doi:10.1038/s41467-023-42491-0), 2023-11-07
Supplement: 41467_2023_42491_MOESM3_ESM.pdf [file 41467_2023_42491_MOESM3_ESM.pdf]

## Description of Additional Supplementary Files

File Name: Supplementary Data 1

Description: List of European populations and unrelated European samples included in our panel.

File Name: Supplementary Data 2

Description: Study characteristics for unrelated individuals in the European American cohorts.

File Name: Supplementary Data 3

Description: Genetic differentiation ( $F_{ST}$ ) between world-wide populations.

File Name: Supplementary Data 4

Description: European ancestry estimates across the US European American cohorts.

File Name: Supplementary Data 5A

Description: Significant admixture  $f_3$  statistics (Z score < -3) of the form  $f_3(EUR\_X, EUR\_Y; ARIC)$ .

File Name: Supplementary Data 5B

Description: Significant admixture  $f_3$  statistics (Z score < -3) of the form  $f_3(EUR\_X, EUR\_Y; CARDIA)$ .

File Name: Supplementary Data 5C

Description: Significant admixture  $f_3$  statistics (Z score < -3) of the form  $f_3(EUR\_X, EUR\_Y; FHS)$ .

File Name: Supplementary Data 5D

Description: Significant admixture  $f_3$  statistics (Z score < -3) of the form  $f_3(EUR\_X, EUR\_Y; GENOA)$ .

File Name: Supplementary Data 5E

Description: Significant admixture  $f_3$  statistics (Z score < -3) of the form  $f_3(EUR\_X, EUR\_Y; MESA)$ .

File Name: Supplementary Data 6

Description: Relatedness in the European American cohorts and European ancestry-assortative mating ( $F_{IT}$  vs  $F_{ST}$ ).

File Name: Supplementary Data 7

Description: Admixture dating in our combined set of European Americans (Subgroup North) using 3-locus weighted LD decay.

File Name: Supplementary Data 8

Description: The association between rs4988235 and three biological traits (Height, LDL, and BMI) accounting for different levels of population stratification.

File Name: Supplementary Data 9

Description: Cohort-specific association analyses between height and rs4988235.

File Name: Supplementary Data 10

Description: Cohort-specific association analyses between LDL and rs4988235.

File Name: Supplementary Data 11

Description: Cohort-specific association analyses between BMI and rs4988235.

File Name: Supplementary Data 12

Description: Association analysis between height and genetic loci that were highly differentiated in Europe.

File Name: Supplementary Data 13

Description: Genetic loci with strong locus-specific ancestry effect in the GWAS of height.

File Name: Supplementary Data 14

Description: Mantel's correlation between genetic distance matrices derived from population-specific and the projection PCA approaches.
